# Supplementary material for: Germline-like TCR-α chains shared between autoreactive T cells in blood and pancreas
Source: PubMed Central journal article supplement (PMC11176301; doi:10.1038/s41467-024-48833-w), 2024-06-13
Supplement: 41467_2024_48833_MOESM1_ESM.pdf [file 41467_2024_48833_MOESM1_ESM.pdf]

## **Germline-like TCR- $\alpha$ chains shared between autoreactive T cells in blood and pancreas**

Peter S. Linsley<sup>1†</sup>, Maki Nakayama<sup>2</sup>, Elisa Balmas<sup>1</sup>, Janice Chen<sup>1</sup>, Fariba Barahmand-pour-Whitman<sup>1</sup>, Shubham Bansal<sup>1</sup>, Ty Bottorff<sup>1</sup>, Elisavet Serti<sup>3</sup>, Cate Speake<sup>1</sup>, Alberto Pugliese<sup>4</sup>, and Karen Cerosaletti<sup>1</sup>.

<sup>1</sup> Benaroya Research Institute at Virginia Mason, Seattle, Washington, USA.

<sup>2</sup> Barbara Davis Center for Childhood Diabetes, Department of Immunology and Microbiology, University of Colorado School of Medicine, Aurora, CO, USA.

<sup>3</sup> Immune Tolerance Network, Bethesda, Maryland, USA.

<sup>4</sup> Department of Diabetes Immunology & The Wanek Family Project for Type 1 Diabetes, Arthur Riggs Diabetes & Metabolism Research Institute, City of Hope, Duarte, CA, USA

## **Supplementary Data**

**Supplementary Data 1. Characteristics of study participants.**

**Supplementary Data 2. Compiled and filtered TCR sequences used in this study.**

**Supplementary Data 3. Peptide contacts with IAR TCR sequence features.**

**Supplementary Data 4. Overlapping islet peptide libraries.**

**Supplementary Data 5. Flow cytometry antibodies.**

**Supplementary Data 6. DNA sequence encoding P196-1 TCR**

## Supplementary Figures

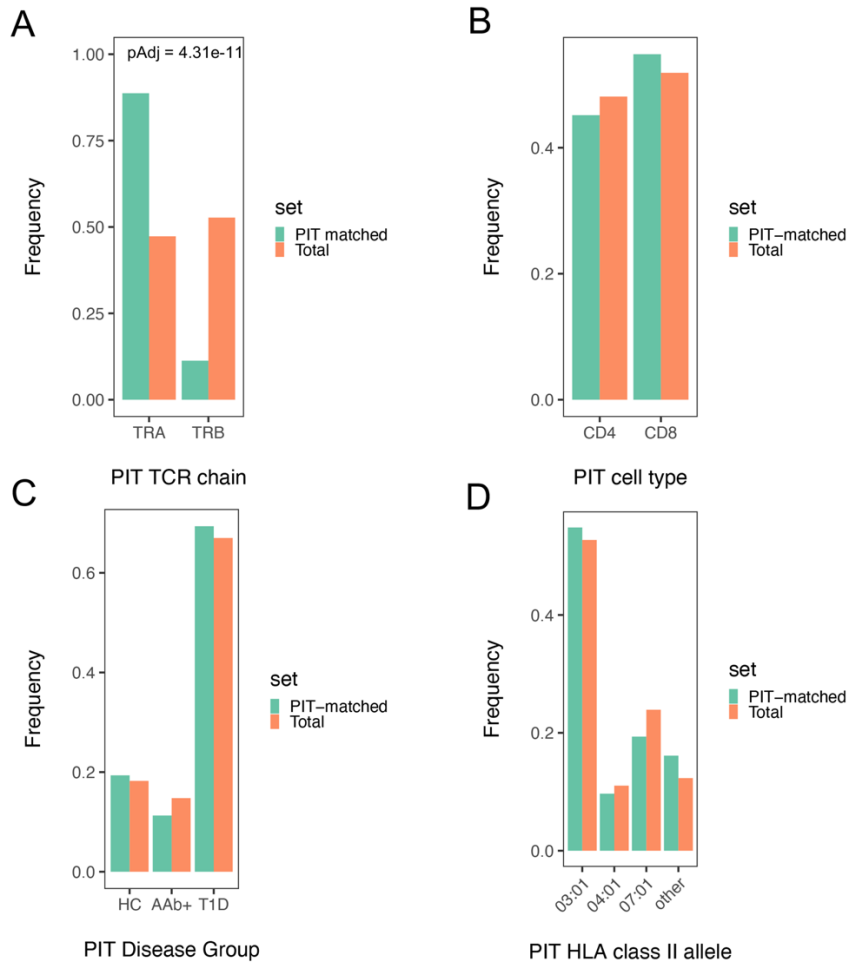

**Supplementary Figure 1. Characteristics of IAR matching versus total PIT TCRs.** A) TCR chain types in perfectly IAR-matching *Cohort 1* (n = 55 *TRA* and 7 *TRB*) and total unique PIT TCRs (n = 9, 757 combined *TRA* and *TRB*, **Table 2**). B) Cell types in IAR-matching (n = 62) and total unique PIT TCRs (total n = 4,695 and 5,063 *CD4* and *CD8*, respectively). C) Patient disease groups of donors in IAR-matching (n = 62) and total unique PIT TCRs (total n = 1,779 *HC*, 1,442 *AAb+* and 6,536 *T1D*). D) HLA class II alleles of in donors of IAR-matching (n = 62) and total unique PIT TCRs (total n = 5,144 *03:01*, 1,077 *04:01*, 2,334 *07:01* and 1,202 alleles other than *03:01*, *04:01* and *07:01*). Differences between groups were assessed using Fisher's exact test.

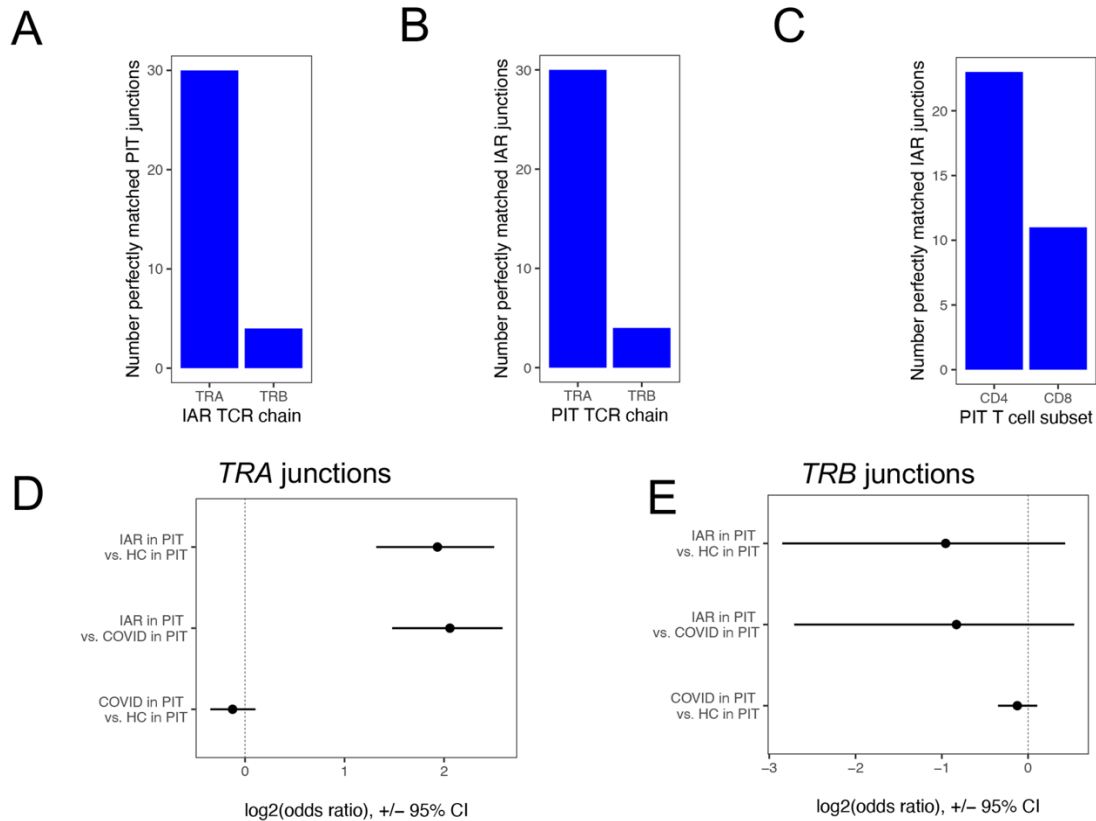

**Supplementary Figure 2. IAR T and PIT TCR sequence matching in Cohort 2. A-G)** As in **Figure 1** but using TCRs from *Cohort 2*. **A)** Perfectly matched IAR *TRA* (n = 30) and *TRB* (n = 4) junctions from *Cohort 2* (**Table 2**) in PIT TCRs (n = 9,757 total unique *TRA* and *TRB* junctions, **Table 2**). **B)** Perfectly matched PIT *TRA* (n = 30) and *TRB* (n = 4) junctions in IAR TCRs (n = 2,141 total unique *TRA* and *TRB* junctions, **Table 2**). **C)** Perfectly matched PIT T cell TCR junctions from CD4+ (n = 23) and CD8+ (n = 11) cells in IAR TCRs. **D)** PIT-matched versus non-matched *TRA* junctions from *Cohort 2* IAR T cell TCRs (n = 30 matched and 1,060 non-matched) compared with *TRA* junctions from unselected HC<sup>20</sup> (185 matched and 24,968 non-matched junctions); and COVID-19 patients<sup>20</sup> (1,341 matched and 197,412 non-matched junctions). Log<sub>2</sub> odds ratios were calculated by Fischer’s exact test. Error bars, 95% confidence intervals. Dotted vertical line, equivalency line. **E)** As in **D** but using *TRB* junctions (n = 4 matched and 1,047 non-matched).

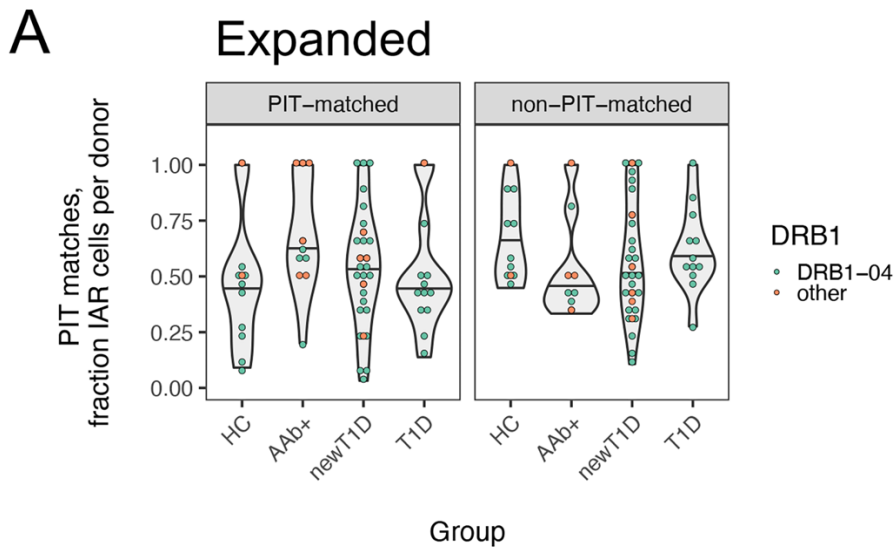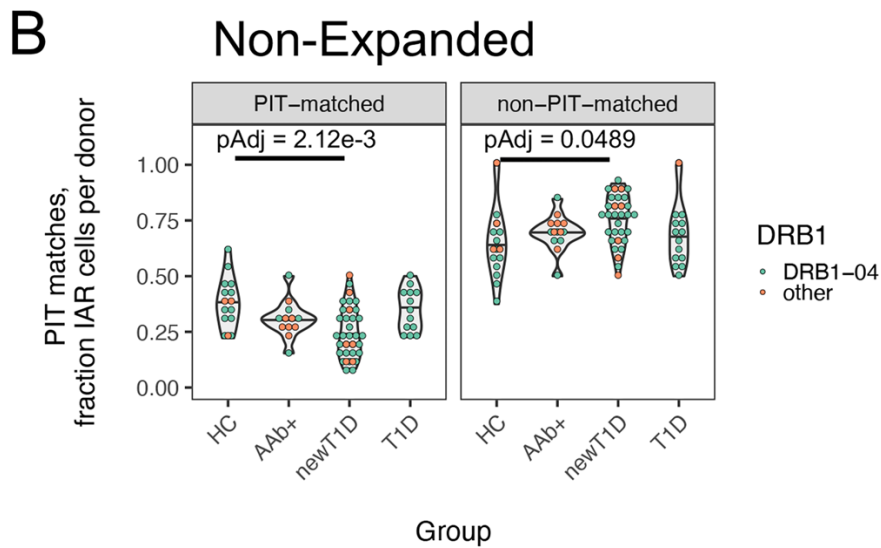

**Supplementary Figure 3. Fractions of PIT-matched and non-matched *TRA* junctions by disease group and TCR expansion.** Tabulated frequencies of PIT-matched and non-matched *TRA* junction numbers by group in combined *Cohorts 1 + 2* as in **Figure 1F** but analyzed at the donor level (**Table 1, Supplementary Data 1**). Differences were assessed using Wilcoxon signed-rank test. Each dot represents a value for an individual donor, colored by HLA-DRB1 allele. The width of the violins represent frequency; horizontal lines within the violins represent median values.

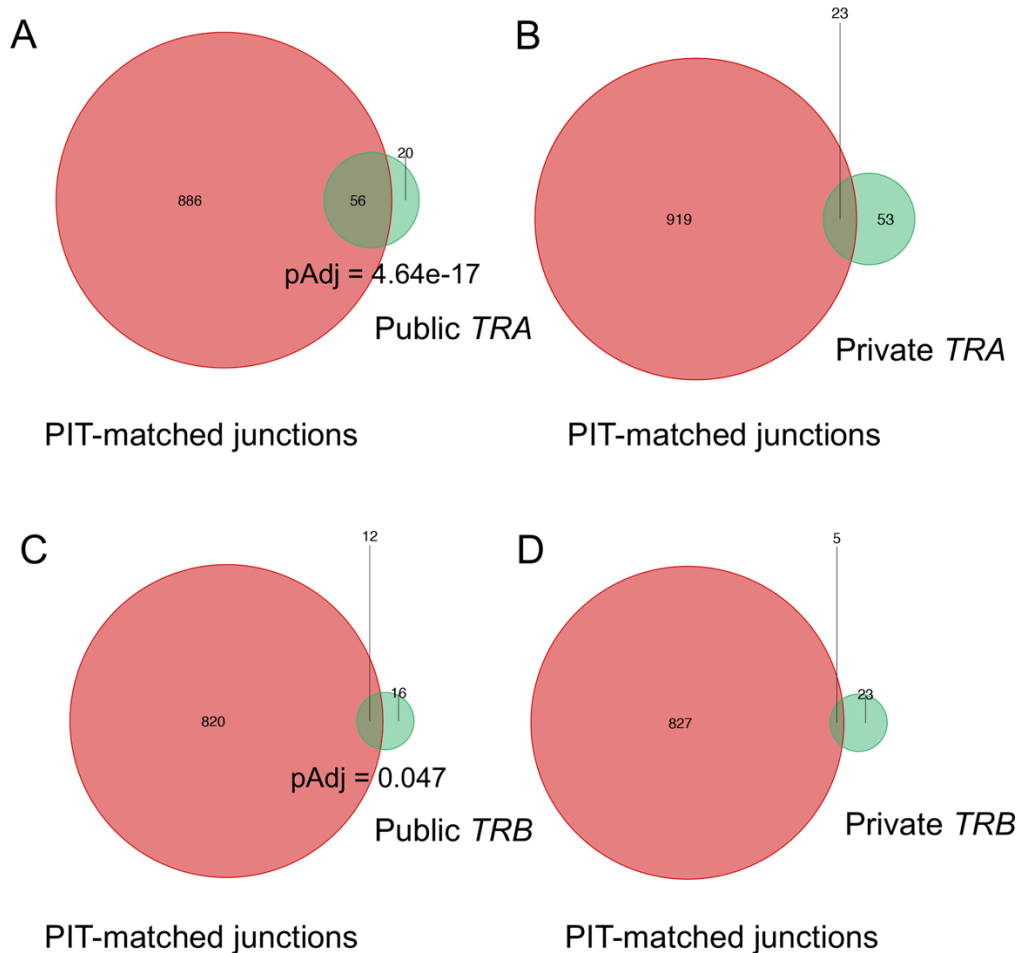

**Supplementary Figure 4. Enrichment of public sequences in PIT-matched *TRA* but not *TRB* junctions.** A) Intersections of unique IAR PIT-matching *TRA* junctions (N = 942) in combined *Cohorts 1 + 2*, with unique public IAR *TRA* junctions (n = 76). B) Intersections of IAR PIT-matching *TRA* junctions, with private IAR *TRA* junctions, down sampled (Methods) to equal numbers as public *TRA* junctions (n = 76). C) Intersections of unique IAR PIT-matching *TRB* junctions (n = 832), with public IAR *TRB* junctions (n = 28). D) Intersections of unique IAR PIT-matching *TRB* junctions (N = 832), and private IAR *TRB* junctions, down sampled to equal numbers as public *TRB* junctions (n = 28). “Universe” values for hypergeometric p-value calculations were n = 3,264 and 3,187 for total unique *TRA* and *TRB* junctions, respectively (Table 2). Differences were assessed using Fisher’s exact test.

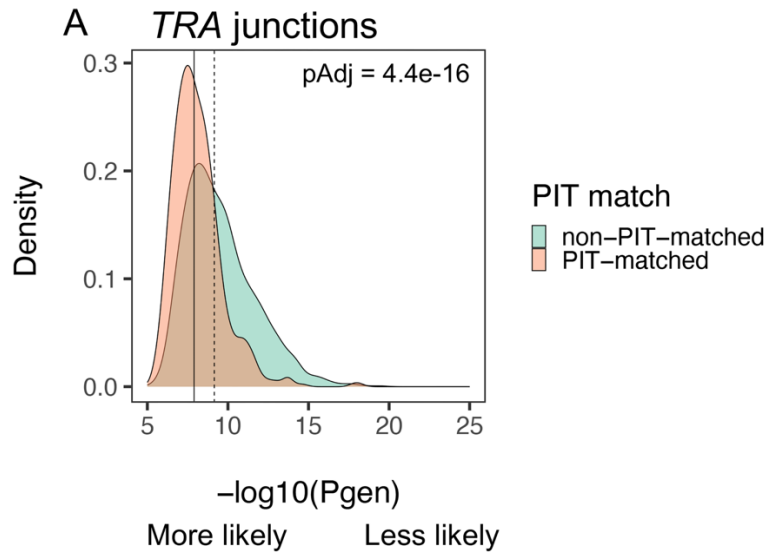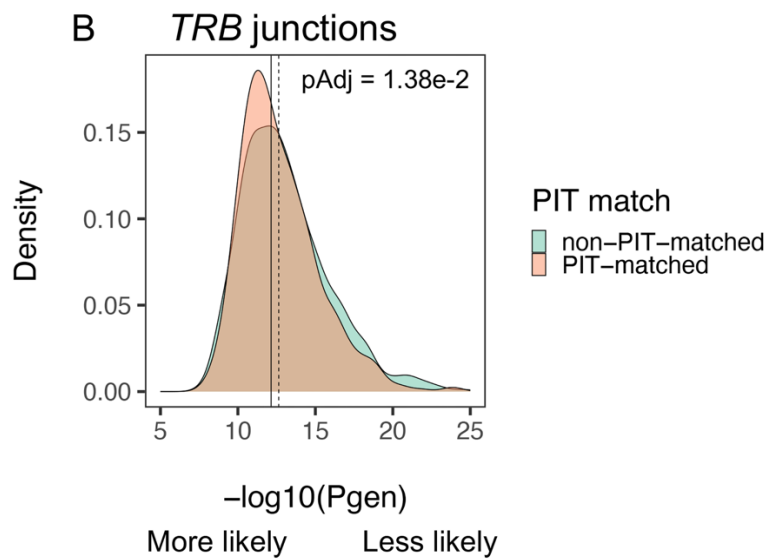

**Supplementary Figure 5. PIT-matched junctions have higher generation probability relative to PIT non-matched junctions.** Shown are distributions of generation probabilities ( $P_{\text{gen}}$ )<sup>1</sup> for PIT-matched and non-PIT-matched *TRA* ( $n = 942$  and  $n = 2,322$ , respectively) (A) and *TRB* (B) ( $n = 832$  and  $n = 2,355$ , respectively) junctions from combined *Cohorts 1 + 2*. Differences were assessed using Kolmogorov-Smirnov test. Solid vertical line, median value from PIT-matched junctions; dashed vertical line, median value from non-PIT-matched junctions.

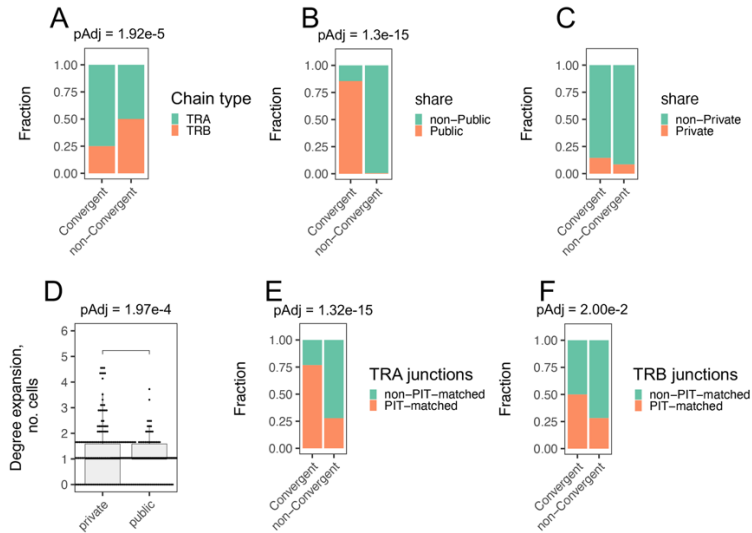

**Supplementary Figure 6. Convergence of public TRA junction nucleotide sequences.** A)

Frequencies of convergent *TRA* and *TRB* junctions. Convergent, number of junction AA sequences encoded by >one nt sequence. There were 90 total convergent junctions (69 *TRA* and 21 *TRB*), and 6,361 non-convergent junctions (~1.4% convergent). Differences were assessed using Fisher's exact test. B) Frequencies of convergent sequences in public and non-public *TRA* junctions. Public, junction having identical AA sequences in >one donor. There were 76 public and 3,188 non-public *TRA* junctions. Differences were assessed using Fisher's exact test. C) Frequencies of convergent sequences in private and non-private *TRA* junctions. Private, junction having identical AA sequences in >1 cell from a single donor only. There were 281 private and 2,983 non-private *TRA* junctions. Differences were assessed using Fisher's exact test. D) Expansion in public and private *TRA* junctions. Expansion, identical junction AA sequences found in >1 cell from one or more donors. There were 357 expanded and 2,907 non-expanded *TRA* junctions. E) Frequencies of PIT-matched sequences in convergent *TRA* junctions. There were 942 PIT-matched and 2,322 non-PIT-matched *TRA* junctions. Differences were assessed using Wilcoxon signed rank test. F). Frequencies of PIT-matched sequences in convergent *TRB* junctions. There were 832 PIT-matched and 2,355 non-PIT-matched *TRB* junctions. Differences were assessed using Fisher's exact test.



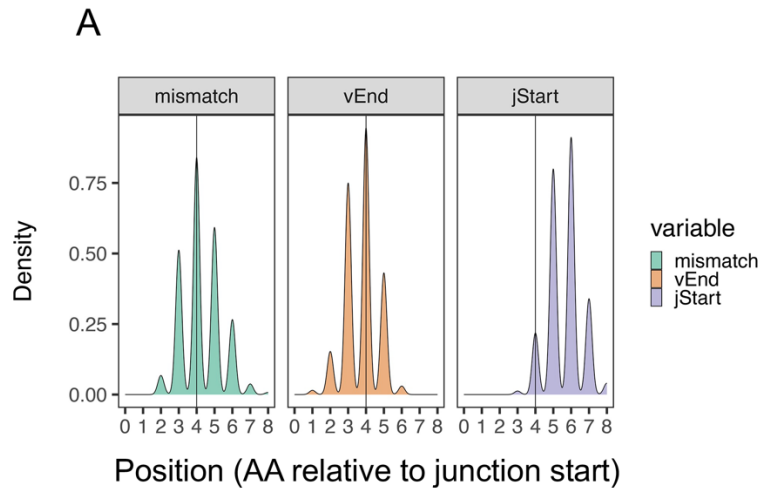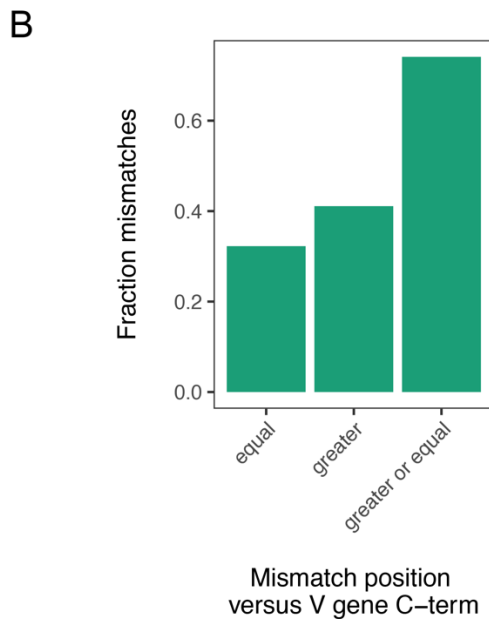

**Supplementary Figure 7. Mismatches between IAR and PIT *TRA* junctions map to templated and non-templated regions.** A) Aggregated distribution of AA sequence positions of PIT mismatches between IAR *TRA* and PIT junctions ( $n = 927$  unique IAR *TRA* junctions with 1 mismatch to a PIT junction). N terminal AA residues from all IAR *TRA* junctions were assigned position = 0. The distribution of positions of observed mismatches was then compared to the C-terminal ends of *V genes* (vEnd) and the N-terminal ends of *J genes* (jStart), as delineated by IMGT/HighV-QUES<sup>2</sup>. Vertical lines, median position of all PIT mismatches. B) Positions of single

PIT mismatches (n = 927) relative to the C-terminal end of the *V gene* in each individual *TRA* junction.

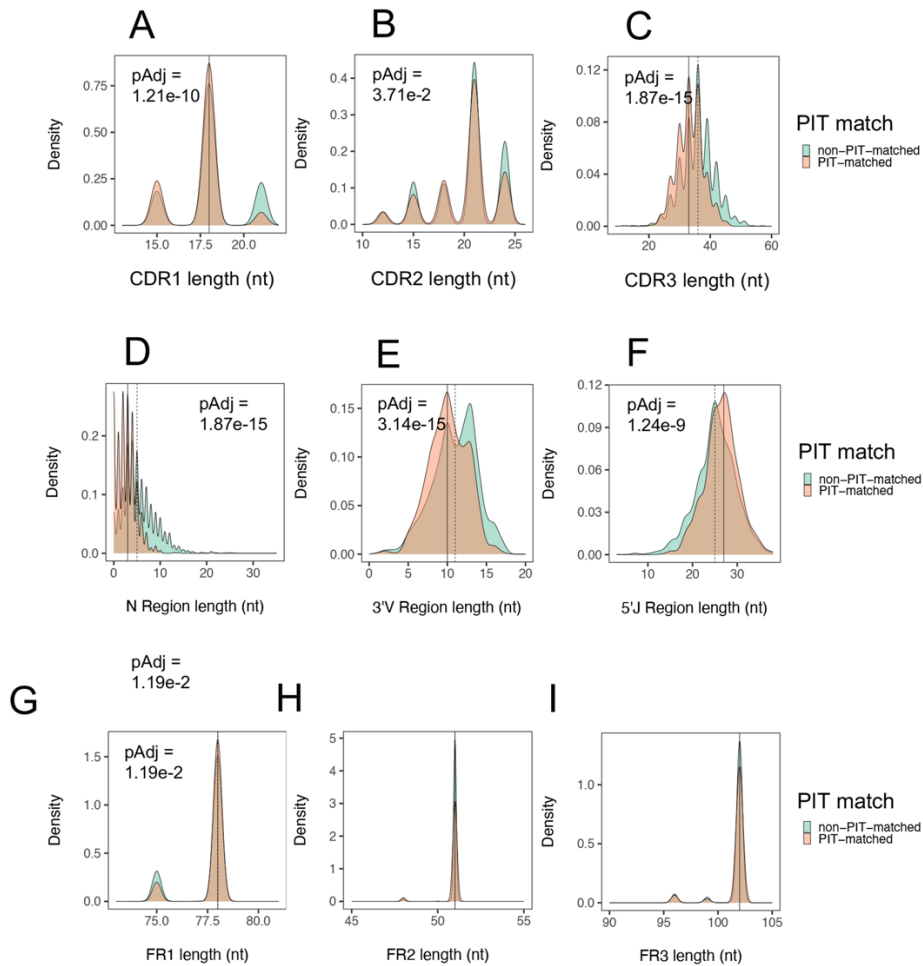

**Supplementary Figure 8. Length differences between PIT-matched and non-matched *TRA* junctions in peptide-contacting regions.** Distributions of sequence lengths (in nt) for features of PIT-matched ( $n = 942$  and  $832$ ) and non-matched ( $n = 2,322$  and  $2,355$ ) *TRA* and *TRB* junctions, respectively, as delineated by IMGT/HighV-QUEST<sup>2</sup> from combined *Cohorts 1+2*. A) CDR1; B) CDR2; C) CDR3; D) N region; E) 3' end of V gene (3' V); F) 5' end of the J region (5' J); G-I) Framework regions FR1, FR2 and FR3, respectively. Differences in values from PIT-matched and non-matched chains were assessed using Kolmogorov-Smirnov test. Solid vertical line, median value from PIT-matched junctions; dashed vertical line, median value from PIT-non-matched junctions.

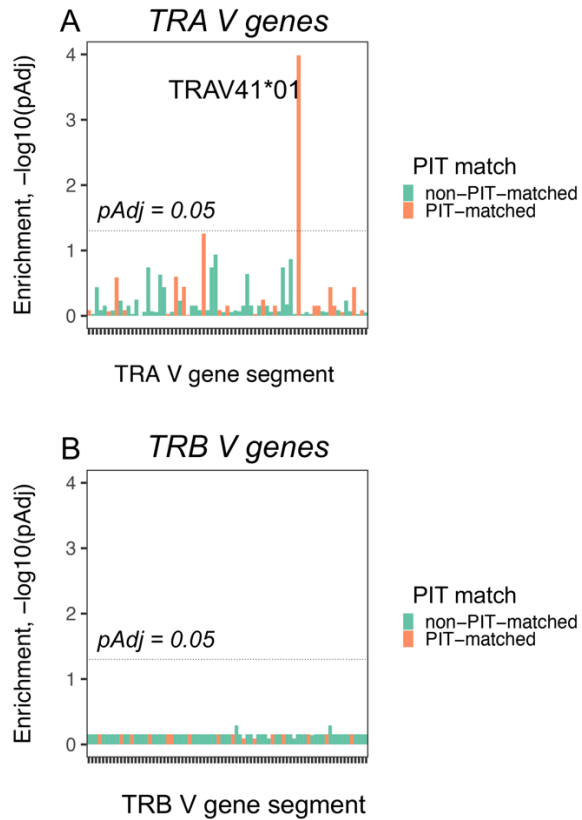

**Supplementary Figure 9. *TRA V* genes enriched in PIT- matched versus non-PIT-matched TCRs.**

We enumerated numbers of PIT-matches and -non-matches for each *TRA* and *TRB* V gene found in IAR T cells using IMGT/HighV-QUEST<sup>2</sup> ( $n = 71$  *TRA V* genes,  $78$  *TRB V* genes, **Supplementary Data 2**). Shown is a bar plot of  $-\log_{10}$  FDR-adjusted ( $\text{pAdj}$ ) values for differences between abundance for each V gene in PIT-matched and non-matched TCR chains, determined by Fisher's exact test. Dotted line,  $\text{pAdj} = 0.05$ .

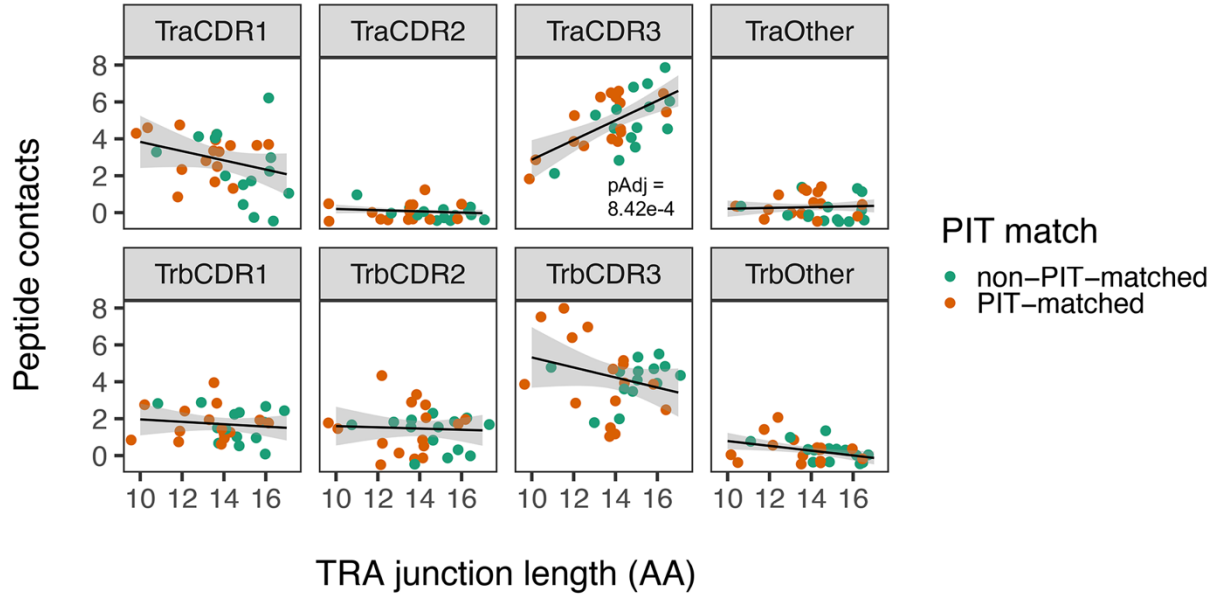

**Supplementary Figure 10. Distribution of peptide contact regions in PIT-matched and PIT-non-matched TCR sequence features.** We identified predicted peptide contact residues from molecular models of PIT-matched and PIT-non-matched TCRs and mapped these to various sequence features. Plotted are numbers of contact residues in each TCR chain sequence by subject feature plotted versus *TRA* junction length. Difference in slopes of best fit lines from zero were calculated using linear modeling.



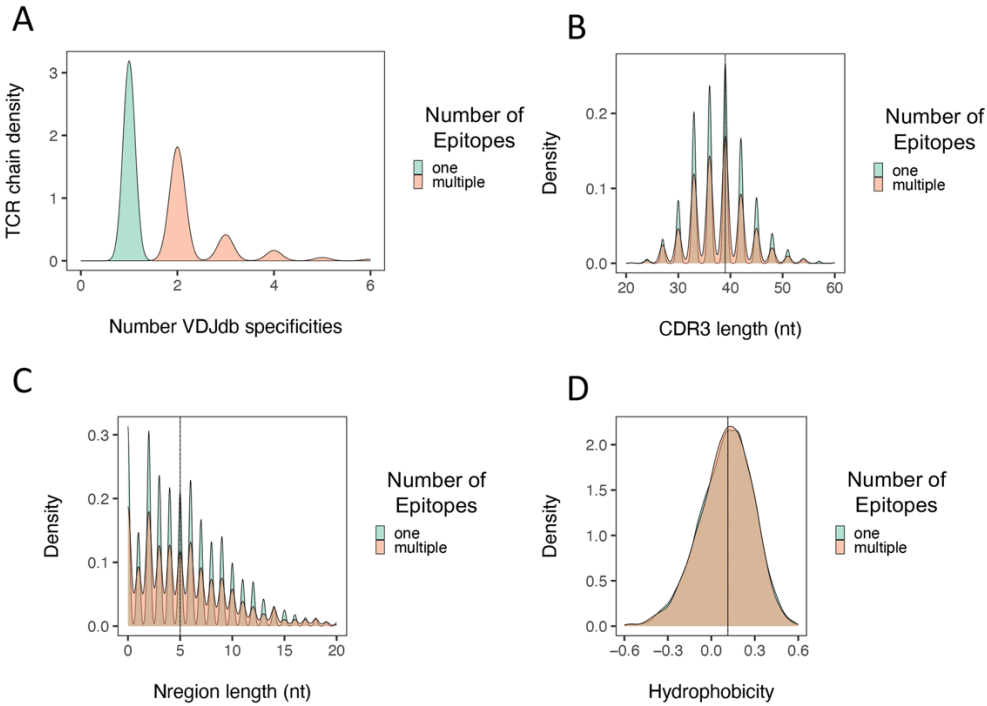

**Supplementary Figure 12. *TRB* junctions from cross-reactive TCRs in the *VDJdb* database were not shorter and did not encode more hydrophobic peptide sequences than junctions from single specificity TCRs.** A) Density of *TRB* chains from TCRs with one versus multiple specificities in *VDJdb*. There were  $N = 19,508$  unique *TRB* chains from TCRs with single specificity and  $N = 1,292$  with multiple specificities. B) Distribution of *TRB* CDR3 nt lengths from TCRs with one versus multiple specificities; C) Distribution of *TRB* N region nt lengths. D) Distribution of *TRB* junction AA hydrophobicity. Solid vertical lines, median values from TCRs with multiple specificities; Dashed vertical lines, median values in *TRB* regions from TCRs with single reported specificities. Differences in distributions were assessed using Kolmogorov-Smirnov tests.

CL529380

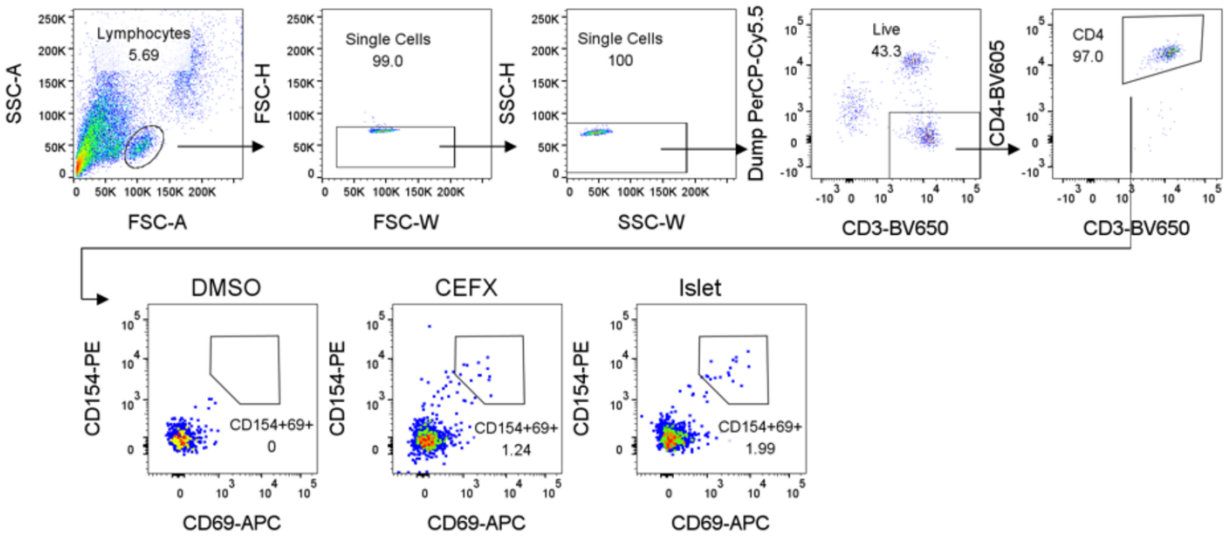

**Supplementary Figure 13. Gating strategy for flow cytometry identification of IAR CD4+ T cells for single cell sorting from sample, CL529380.** PBMC were stimulated with DMSO (vehicle), foreign antigen (CEFX, positive control), or a pool of class II optimized peptides from islet proteins after overnight culture. Cells were gated as lymphocytes → single cells (X2) → Live, CD3+ cells (dump included Viaprobe, anti-CD8, -CD19, -CD14, -CD56, -CD161, and - $\alpha$ 24-J $\alpha$ 18 to remove iNKT cells) → CD4+ T cells. Activated cells within the CD4+ T cell population were identified as CD154+CD69+.



## References.

1. Sethna Z, Elhanati Y, Callan CG, Walczak AM, Mora T. OLGA: fast computation of generation probabilities of B- and T-cell receptor amino acid sequences and motifs. *Bioinformatics*. 2019 Sep 1;35(17):2974–2981. PMID: 31665909
2. Alamyar E, Duroux P, Lefranc MP, Giudicelli V. IMGT(®) tools for the nucleotide analysis of immunoglobulin (IG) and T cell receptor (TR) V-(D)-J repertoires, polymorphisms, and IG mutations: IMGT/V-QUEST and IMGT/HighV-QUEST for NGS. *Methods Mol Biol*. 2012;882:569–604. PMID: 22665256
