# Supplementary material for: Germline-like TCR-α chains shared between autoreactive T cells in blood and pancreas
Source: PubMed Central journal article supplement (PMC11176301; doi:10.1038/s41467-024-48833-w), 2024-06-13
Supplement: 41467_2024_48833_MOESM3_ESM.pdf [file 41467_2024_48833_MOESM3_ESM.pdf]

## **Description of Additional Supplementary Files**

File Name: Supplementary Data 1

Description: Characteristics of study participants.

File Name: Supplementary Data 2

Description: Compiled and filtered TCR sequences used in this study.

File Name: Supplementary Data 3

Description: Peptide contacts with IAR TCR sequence features.

File Name: Supplementary Data 4

Description: Overlapping islet peptide libraries.

File Name: Supplementary Data 5

Description: Flow cytometry antibodies.

File Name: Supplementary Data 6

Description: DNA sequence encoding P196-1 TCR.
